# Supplementary material for: Artificial neurosynaptic device based on amorphous oxides for artificial neural network constructing
Source: Royal Society of Chemistry journal article supplement (doi:10.1039/d4tc01244e), 2024-01-01
Supplement: d4tc01244e1.pdf [file d4tc01244e1.pdf]

## **Supplementary Information**

### **Artificial Neurosynaptic Device Based on Amorphous Oxides for Artificial Neural Network Constructing**

Qiujiang Chen<sup>#</sup>, Ruqi Yang<sup>#</sup>, Dunan Hu, Zhizhen Ye, Jianguo Lu<sup>\*</sup>

State Key Laboratory of Silicon and Advanced Semiconductor Materials and School of Materials  
Science and Engineering, Zhejiang University, Hangzhou 310027, China

<sup>#</sup>These authors contribute equally to this manuscript.

Corresponding Authors:

E-mail: [lujianguo@zju.edu.cn](mailto:lujianguo@zju.edu.cn) (Jianguo Lu);

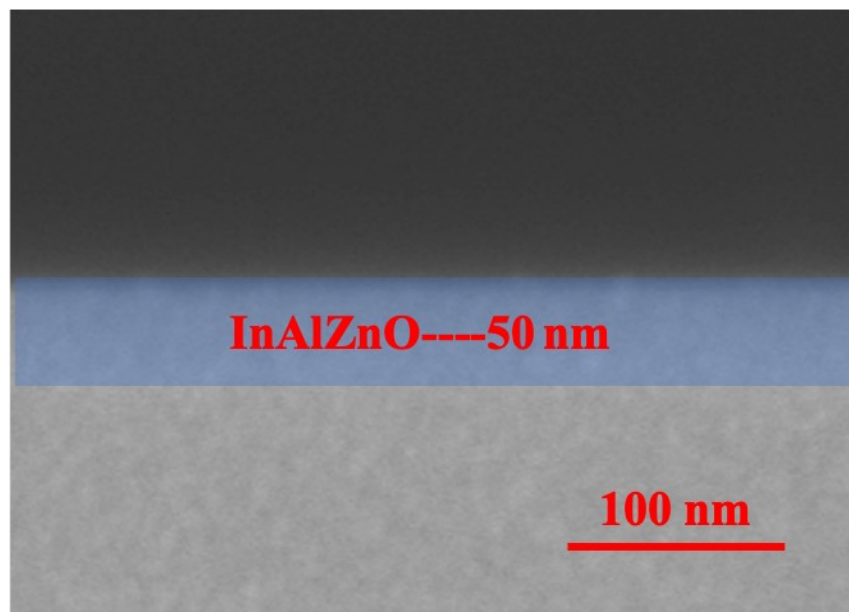

**Fig. S1** The SEM of cross-sectional image of the device

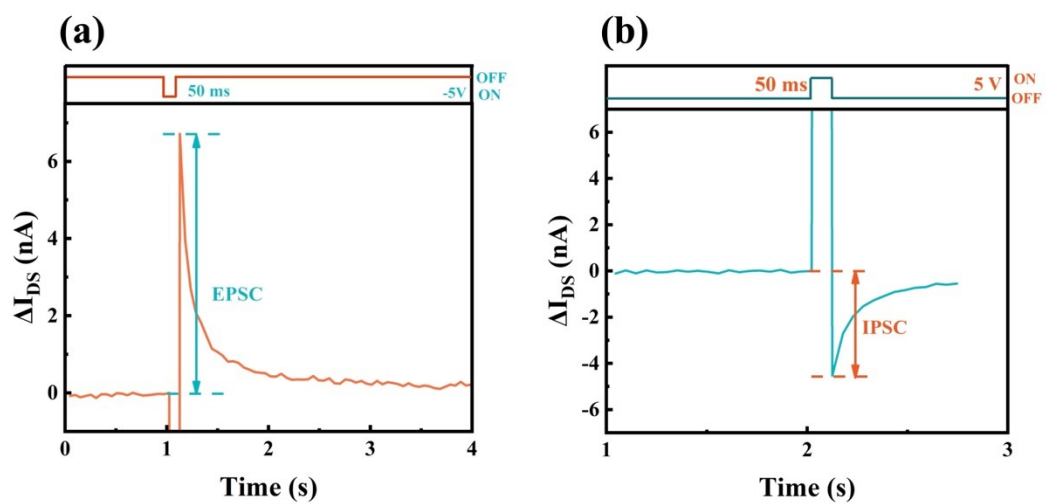

**Fig S2** (a) EPSC generated by a single stimulation (-5 V, 50 ms) of the synaptic device b) EPSC generated by a single stimulation (-5 V, 50 ms) of the synaptic device

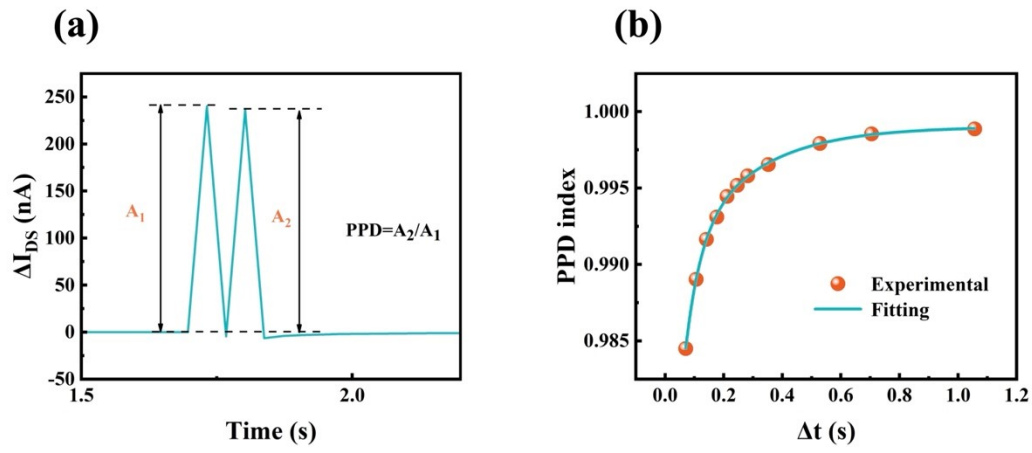

**Fig.**

**S3** (a)  $\Delta I_{DS}$  stimulated by two electrical pulses at  $V_G = 5$  V with the pulse duration of 0.03 s and interval of 0.07 s. (b) PPD index as a function of interval time  $\Delta t$ , where the data are fitted with a double exponential function.

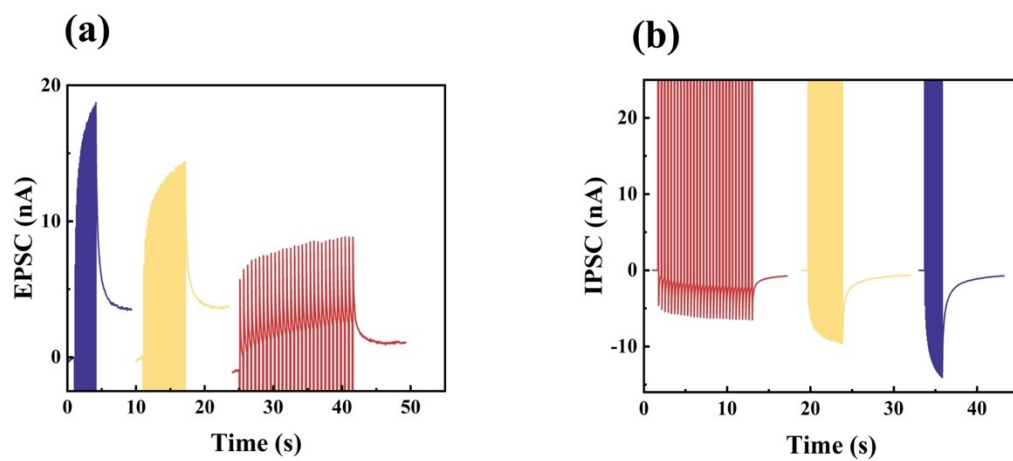

**Fig S4** (a) Plot of EPSC as a function of pulse frequency. (b) Plot of IPSC as a function of pulse frequency.

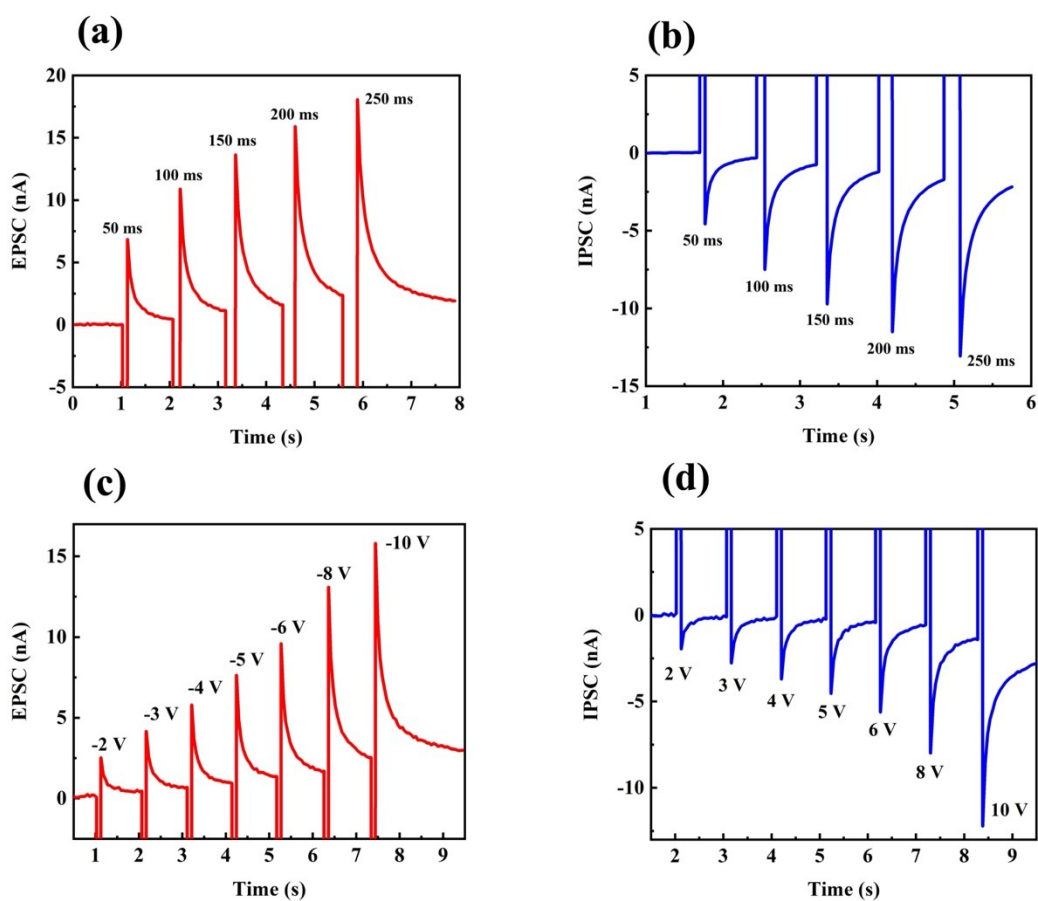

**Fig. S5** (a) Original image of EPSC changing with stimulation duration. (b) Original image of IPSC changing with stimulation duration. (c) Original image of EPSC changing with gate voltage. (d) Original image of IPSC changing with gate voltage.

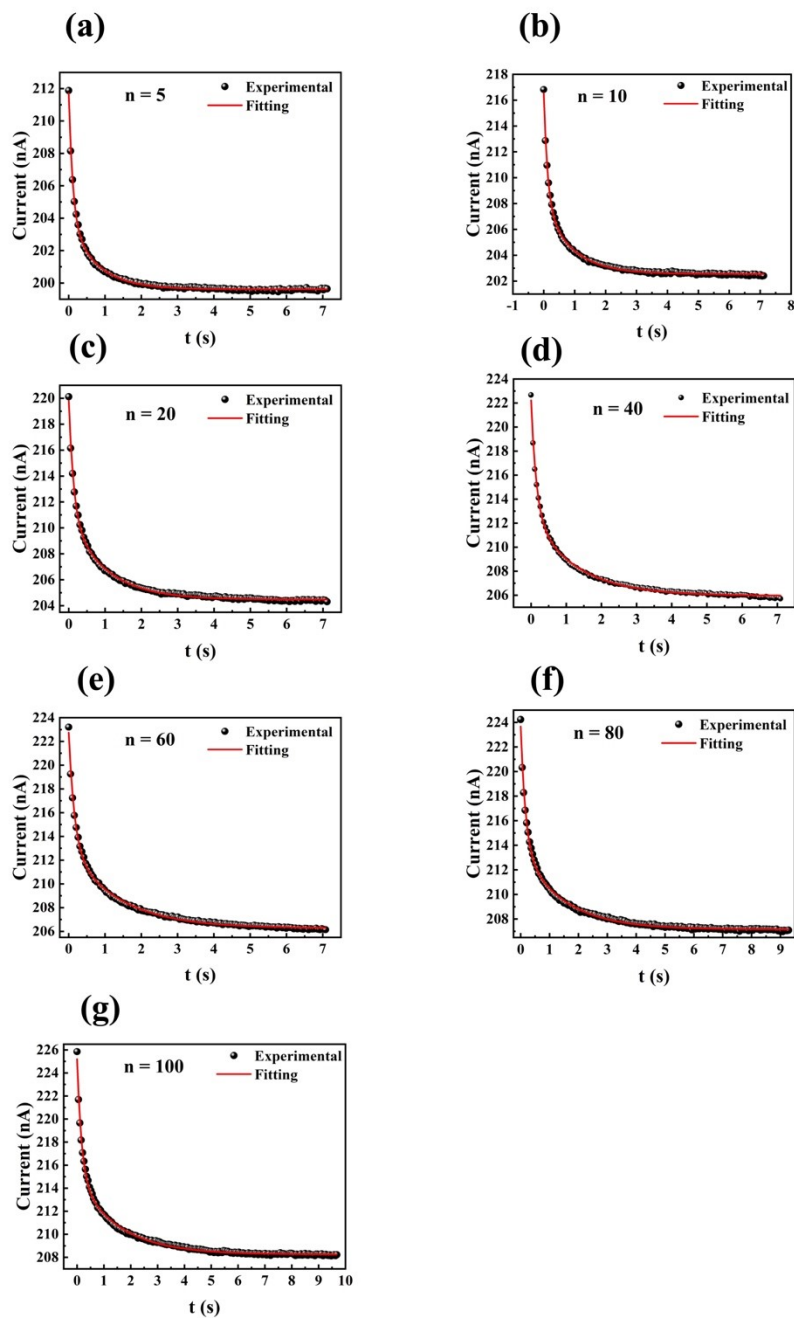

**Fig. S6** Current decay curves for different number of positive pulses. It is fitted by equation.3.

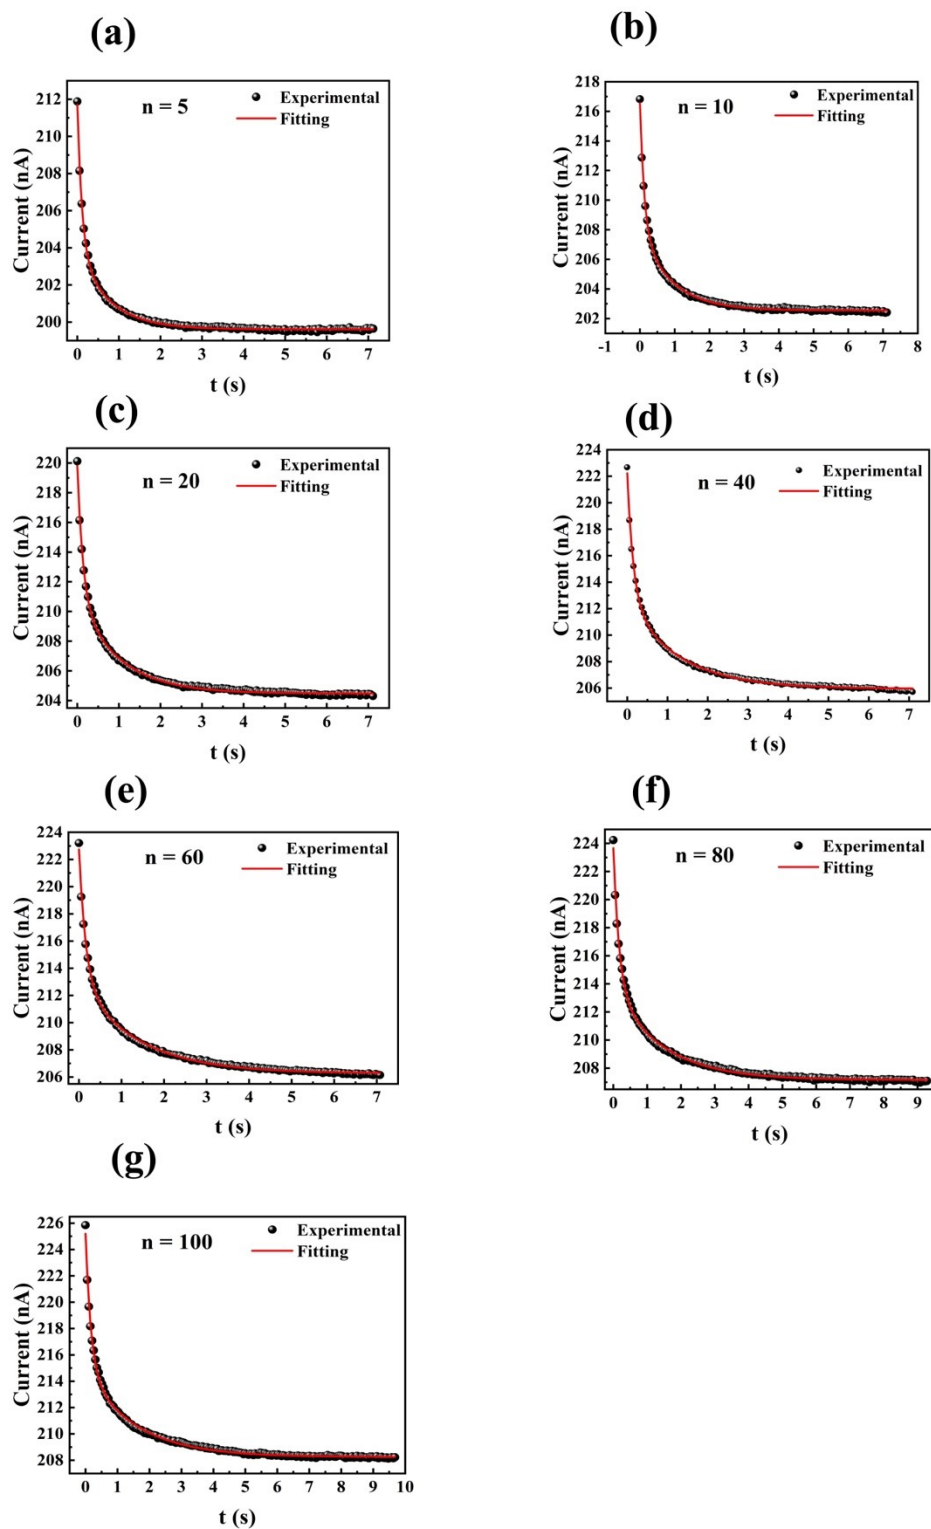

**Fig. S7** Current decay curves for different number of negative pulses. It is fitted by equation.3.



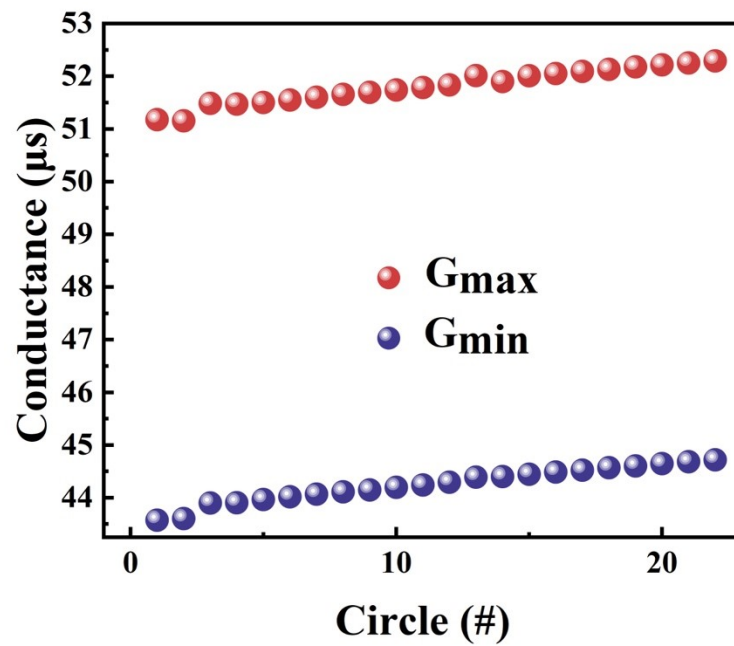

**Fig. S8** Variation of  $G_{\text{max}}$  and  $G_{\text{min}}$  of LTP/LTD process of 22 cycles.
